# Supplementary material for: A multi-parametric microarray for protein profiling: simultaneous analysis of 8 different cytochromes via differentially element tagged antibodies and laser ablation ICP-MS
Source: Royal Society of Chemistry journal article supplement (doi:10.1039/c3an00468f), 2013-01-01
Supplement: c3an00468f.pdf [file c3an00468f.pdf]

## SUPPORTING INFORMATION

# Multi-parametric microarray for protein profiling: Simultaneous detection of 8 different cytochromes via differentially element tagged antibodies and LA-ICP-MS

Larissa Waentig, Sandra Techritz, Norbert Jakubowski and Peter H. Roos

**Table S-1: Treatment of rats with xenobiotics and preparation of liver microsomes.** Male or female Sprague Dawley rats weighing about 200 g were exposed to several CYP inducing substances. Amounts, duration of treatment and application routes are indicated. \*Amounts are stated as percentage in drinking water or diet (ad libitum) or as mg/kg body weight per day for the intraperitoneal (i.p.) application of lipophilic compounds solubilized in corn oil. \*\*For the mixture NF/Iso NF was applied on day 1 to 3 and Iso on day 4. The next day after exposure, liver microsomes were prepared by differential centrifugation from the inducer-treated rats and also of untreated male (UT m) and female (UT f) rats as described by Guengerich.<sup>[1]</sup> After the last ultracentrifugation for 1 h at 105,000 x g, the microsomal pellet was re-suspended in about 500 µl 10 mM Tris-HCl, pH 7.4, 20 % glycerol, 0.1 mM EDTA. All microsomal preparations were immediately frozen in liquid nitrogen and subsequently stored at -70°. The experiments were performed in compliance with the German Animal Protection Law (permissions 23.8720 no. 24.7 and 23.8720 no. 20.35, Bezirksregierung Arnsberg). CYP enzymes which are preferentially induced by the xenobiotics are indicated.

| Xenobiotics                        | Code   | Amount *       | Days   | Application       | Induced CYP | Ref.     |
|------------------------------------|--------|----------------|--------|-------------------|-------------|----------|
| Phenobarbital                      | PB     | 0.1%           | 10     | in drinking water | 2B1         | [2]      |
| Dexamethasone                      | DEX    | 30 mg          | 4      | i.p. in corn oil  | 3A          | [2]      |
| 3-methylcholantrene                | 3MC    | 20 mg          | 3      | i.p. in corn oil  | 1A1, 1A2    | [2]      |
| Clotrimazole                       | CLO    | 320 mg         | 4      | i.p. in corn oil  | 3A          | [3]      |
| β-naphthoflavone                   | NF     | 40 mg          | 4      | i.p. in corn oil  | 1A1, 1A2    | [2]      |
| β-naphthoflavone/<br>Isosafrole ** | NF/Iso | 60mg<br>150 mg | 3<br>1 | i.p. in corn oil  | 1A1, 1A2    | -<br>[3] |
| Triacetyloleandomycin*             | TAO    | 1.5%           | 10     | in diet           | 3A          | [4]      |
| Isoniazide*                        | INH    | 0.1%           | 10     | In drinking water | 2E1         | [2]      |

**Table S-2: Antibody sources.** Anti-CYP1A1 and anti-cytochrome b<sub>5</sub> (Cyt b<sub>5</sub>) were produced in the lab of P.H. Roos at Ruhr-University Bochum, Bochum, Germany. Antibodies were modified with metal coded affinity tags (MeCAT, Proteome Factory, Berlin, Germany) as described by Waentig et al.<sup>[5]</sup> If the antibody stock contains additives like BSA or gelatine, a purification step was applied before tagging by using Pierce<sup>®</sup> Antibody Clean-up Kit (Thermo Fisher Scientific, Bonn, Germany). Each single antibody was tested in a LA-ICP-MS based Westernblot immunoassay. (Figure S-1 – S-3).

| Anti-              | Type                         | Manufacturer                                  | MeCAT |
|--------------------|------------------------------|-----------------------------------------------|-------|
| CYP2E1             | Polyclonal IgG               | Abcam, Cambridge, UK                          | Er    |
| CYP4A1             | Monoclonal IgG <sub>2b</sub> | Santa Cruz Biotechnology, Heidelberg, Germany | Eu    |
| CYP3A              | Polyclonal IgG               | Santa Cruz Biotechnology, Heidelberg, Germany | Ho    |
| CYP2C6             | Monoclonal IgG1              | Abcam, Cambridge, UK                          | Lu    |
| CYP1A1             | Monoclonal IgG1              | Produced by Roos et al.                       | Nd    |
| CYP1A2             | Monoclonal IgG1              | Abcam, Cambridge, UK                          | Pr    |
| Cyt b <sub>5</sub> | Monoclonal IgG1              | Produced by Roos et al.                       | Tb    |
| CYP2B1/2B2         | Monoclonal IgG1              | Abcam, Cambridge, UK                          | Tm    |

**Table S-3: Typical optimized operating conditions for LA-ICP-MS.** A commercial LA system (New Wave 213, ESI, Portland, USA) was coupled to an ICP sector field mass spectrometer (Element XR, Thermo Fisher Scientific, Germany). The ICP was tuned daily for maximum ion intensity, keeping the oxide ratio (ThO/Th) below 5 % using a microscopic glass slide as the control standard for ablation. The isotopes  $^{127}\text{I}$ ,  $^{141}\text{Pr}$ ,  $^{153}\text{Eu}$ ,  $^{142}\text{Nd}$ ,  $^{159}\text{Tb}$ ,  $^{165}\text{Ho}$ ,  $^{166}\text{Er}$ ,  $^{169}\text{Tm}$  and  $^{175}\text{Lu}$  have been selected for analysis.

| <b>ICP-MS</b>                             |                                                                                        |
|-------------------------------------------|----------------------------------------------------------------------------------------|
| RF plasma source                          | 1350 W                                                                                 |
| Plasma gas                                | 15 L min <sup>-1</sup> Ar                                                              |
| Auxiliary gas                             | 1.0 L min <sup>-1</sup> Ar                                                             |
| Transport gas                             | 0.6 L min <sup>-1</sup> Ar                                                             |
| Mass resolution<br>(m/ $\Delta$ m)        | 300                                                                                    |
| Scanning mode                             | E scan                                                                                 |
| Dwell time                                | 2 ms                                                                                   |
| <b>LA system for microarray analysis</b>  |                                                                                        |
| Wavelength                                | 213 nm                                                                                 |
| Helium gas flow                           | 1 L min <sup>-1</sup>                                                                  |
| Laser energy                              | 35 %                                                                                   |
| Laser spot size                           | 200 $\mu\text{m}$                                                                      |
| Scan speed                                | 200 $\mu\text{m s}^{-1}$                                                               |
| Repetition frequency                      | 20 Hz                                                                                  |
| Ablation mode                             | Scanning line by line next to each other                                               |
| Analysis time                             | Approx. 2.5 h for one slide of 20 x 18 mm (including wash out delay and Laser warm-up) |
| <b>LA system for Westernblot analysis</b> |                                                                                        |
| Wavelength                                | 213 nm                                                                                 |
| Helium gas flow                           | 1 L min <sup>-1</sup>                                                                  |
| Laser energy                              | 35 %                                                                                   |
| Laser spot size                           | 250 $\mu\text{m}$                                                                      |
| Scan speed                                | 250 $\mu\text{m s}^{-1}$                                                               |
| Repetition frequency                      | 20 Hz                                                                                  |
| Ablation mode                             | Scanning line by line with 750 $\mu\text{m}$ space in between the lines                |
| Analysis time                             | Approx. 35 min for four sample lanes (35 x 15 mm)                                      |

**Figure S-1:** Intensity profiles of a LA-ICP-MS based Multiplex-Westernblot immunoassay for quality control of MeCAT tagged antibodies of Table S-2. Selected liver microsomal protein (5 $\mu$ g each) of inducer treated rats was applied to SDS-PAGE and subsequently transferred to the nitrocellulose-membrane. A detailed description of the Westernblot procedure is given in reference [5]. The immunoassay procedure was done according to the microarray immune reaction summarized in table 1 of the main article. The blot membrane was exposed for 2 hours to the tagged antibody diluted in TBS-T at a concentration of 0.2  $\mu$ g mL<sup>-1</sup>. The intensity profiles of the Westernblots can't be directly compared to the expression profiles produced by the microarray (Figure 1 in the main article) because of the absence of internal standards, loading controls and data normalization.

**Anti-CYP3A-MECAT(Ho)**

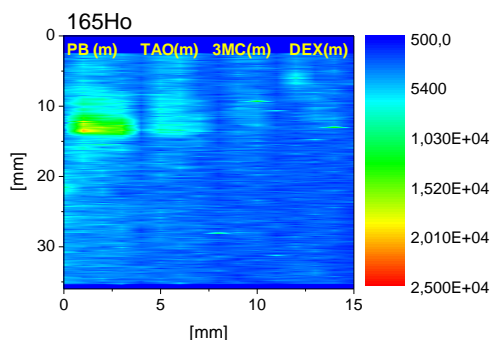

**Anti-CYP2C6-MECAT(Lu)**

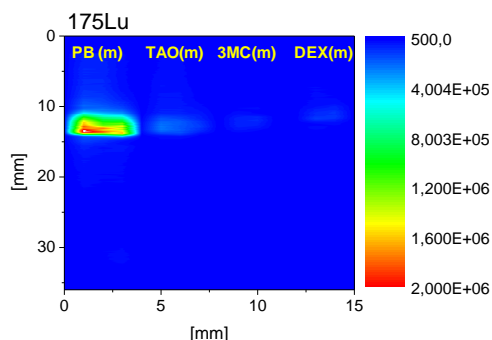

**Anti-CYP4A1-MeCAT(Eu)**

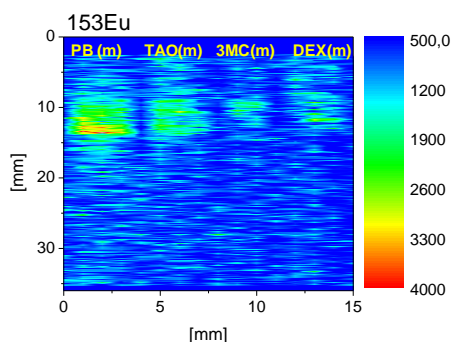

**CBB stained control gel**

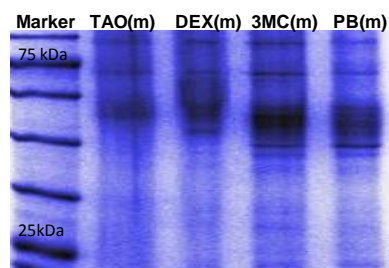

**FigureS- 2:** Intensity profiles of a LA-ICP-MS based Multiplex-Westernblot immunoassay for quality control of MeCAT tagged antibodies of Table S-2. Sample preparation was analog to figure S-1. Remark: Cytochrome b5 is normally not affected by the selected xenobiotics. The reason for the high intensity belonging to the protein band in lane 2 is the application of a higher amount of protein ( $> 5 \mu\text{g}$ ) to the gel. This is also visible in the picture of the control gel where the protein bands belonging to PB(m) are stronger stained than the ones of UT(m) and 3MC(m).

**Anti-Cytochrome b5-MeCAT(Tb)**

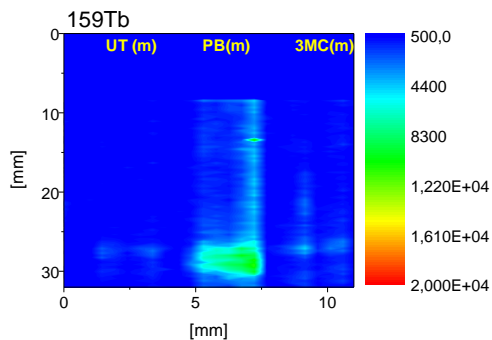

**Anti-CYP1A1-MeCAT(Nd)**

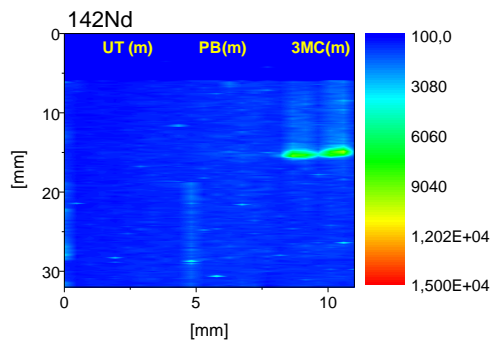

**Anti-CYP1A2-MeCAT(Pr)**

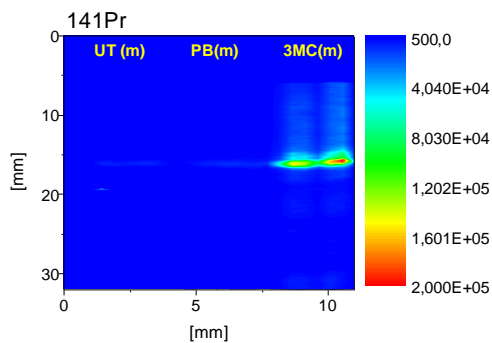

**Anti-CYP2B1/2B2-MeCAT(Tm)**

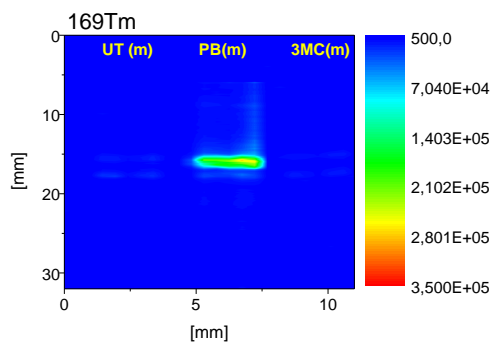

**CBB stained control gel**

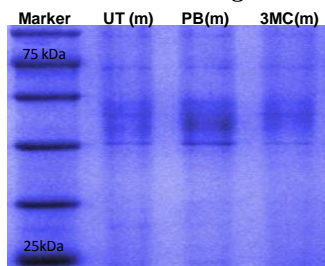

**Figure S-3:** Intensity profiles of a LA-ICP-MS based Westernblot immunoassay for quality control of MeCAT tagged anti-CYP2E1 antibody of Table S-2. Sample preparation was analog to Figure S-1.

**Anti-CYP2E1-MeCAT(Er)**

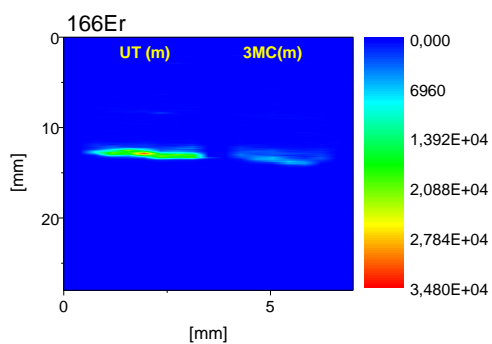

**CBB stained control gel**

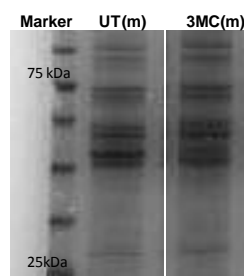

**Figure S-4: 2D Intensity profiles of a multi-parametric microarray detected via LA-ICP-MS.** The antibody pool is summarized in Table S-2. The intensity profile of the iodinated BSA (internal standard) also shows the sample orientation. Each grid includes 4 replicates of each sample. Grid 1: DEX w; Grid 2: DEX m; Grid 3: UT w; Grid 4: INH m; Grid 5: PB w; Grid 6: TAO w; Grid 7: BSA-I (blank sample for taking unspecific signaling background into account); Grid 8: PB m; Grid 9: NF/Iso m; Grid 10: TAO m; Grid 11: NF w; Grid 12: UT m; Grid 13: CLO f; Grid 14: 3MC m. The seven Grids are summarized to one supergrid. In total four supergrids were spotted on a NC slide.

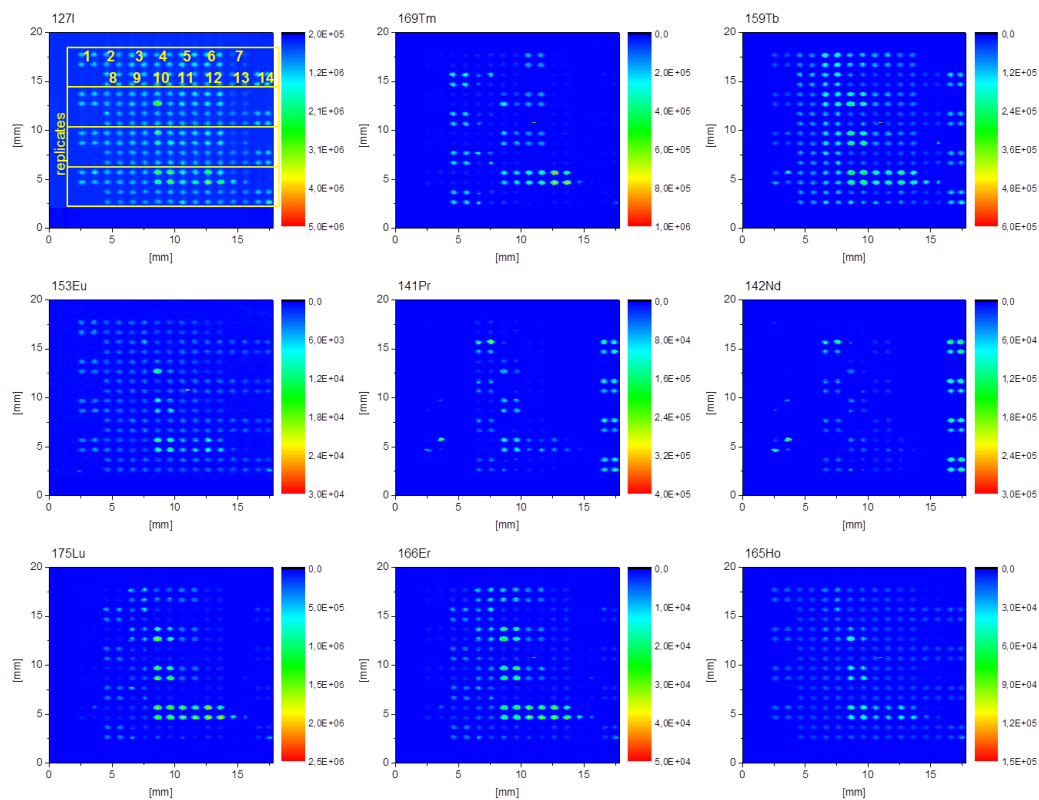

**Table S-2: Data set used for calculation and discussion of figure 2 (main text).** Peak areas of single microarrays and multi-parametric microarrays calculated from LA-ICP-MS intensity profiles. Not analyzable samples were marked with a red arrow and were not used for data comparison.

| Single microarrays          |         |         |         |         |          |         |         |         |         |         |         |         |
|-----------------------------|---------|---------|---------|---------|----------|---------|---------|---------|---------|---------|---------|---------|
|                             | UT m    | PB m    | DEX m   | 3MC m   | NF/Iso m | IAO m   | INH m   | UT f    | PB f    | DEX f   | CLO f   | TAO f   |
| CYP2E1                      | 0.02141 | 0.07505 | 0.01688 | 0.02045 | 0.03977  | 0.01549 | 0.04596 | 0.05989 | 0.05055 | 0.00883 | 0.00532 | 0.00976 |
| CYP4A1                      | 0.00165 | 0.00186 | 0.00187 | 0.00103 | 0.00256  | 0.00125 | 0.00127 | 0.00134 | 0.00111 | 0.00293 | 0.00137 | 0.00179 |
| CYP3A                       | 0.00187 | 0.00200 | 0.00163 | 0.00289 | 0.00341  | 0.00150 | 0.00178 | 0.00524 | 0.00174 | 0.00219 | 0.00205 | 0.00098 |
| CYP2C6                      | 0.05604 | 0.22446 | 0.03735 | 0.06032 | 0.09364  | 0.04378 | 0.10839 | 0.12437 | 0.15956 | 0.01836 | 0.00912 | 0.02610 |
| CYP1A1                      | 0.00248 | 0.00258 | 0.00354 | 0.36377 | 0.18947  | ↗       | ↗       | ↗       | ↗       | ↗       | 0.00257 | 0.05175 |
| CYP1A2                      | 0.00140 | 0.00142 | 0.00069 | 0.10358 | 0.11465  | ↗       | ↗       | 0.00840 | ↗       | ↗       | 0.00041 | 0.00663 |
| Cyrb5                       | 0.02973 | 0.07273 | 0.04402 | 0.07500 | 0.10345  | 0.02956 | 0.04797 | 0.11484 | 0.05526 | 0.02251 | 0.02182 | 0.02068 |
| CYP2B1                      | 0.07228 | 0.83238 | 0.07417 | 0.03874 | 0.16157  | 0.05737 | 0.09622 | 0.06628 | 0.38352 | 0.03872 | 0.02435 | 0.02141 |
| Multi-parametric microarray |         |         |         |         |          |         |         |         |         |         |         |         |
|                             | UT m    | PB m    | DEX m   | 3MC m   | NF/Iso m | IAO m   | INH m   | UT f    | PB f    | DEX f   | CLO f   | TAO f   |
| CYP2E1                      | 0.00862 | 0.02083 | 0.00732 | 0.00732 | 0.01378  | 0.00749 | 0.05708 | 0.01920 | 0.01935 | 0.00363 | 0.00178 | 0.00312 |
| CYP4A1                      | 0.00157 | 0.00155 | 0.00152 | 0.00102 | 0.00164  | 0.00121 | 0.00121 | 0.00116 | 0.00099 | 0.00215 | 0.00163 | 0.00038 |
| CYP3A                       | 0.00211 | 0.00166 | 0.00188 | 0.00208 | 0.00243  | 0.00168 | 0.00245 | 0.00292 | 0.00172 | 0.00282 | 0.00225 | 0.00093 |
| CYP2C6                      | 0.05444 | 0.21984 | 0.04422 | 0.06251 | 0.10390  | 0.05762 | 0.23756 | 0.15844 | 0.19149 | 0.02094 | 0.00694 | 0.02650 |
| CYP1A1                      | 0.00202 | 0.00126 | 0.00254 | 0.32190 | 0.11201  | ↗       | ↗       | ↗       | ↗       | ↗       | 0.00163 | 0.04826 |
| CYP1A2                      | 0.00158 | 0.00127 | 0.00063 | 0.06755 | 0.04032  | ↗       | ↗       | 0.00987 | ↗       | ↗       | 0.00065 | 0.00744 |
| Cyrb5                       | 0.02765 | 0.05059 | 0.04166 | 0.06209 | 0.06665  | 0.03068 | 0.07172 | 0.08376 | 0.04872 | 0.02246 | 0.01871 | 0.01802 |
| CYP2B1                      | 0.07476 | 0.70647 | 0.08547 | 0.04328 | 0.21638  | 0.07277 | 0.19895 | 0.07490 | 0.45875 | 0.04700 | 0.02387 | 0.02148 |
| RSD [%]                     |         |         |         |         |          |         |         |         |         |         |         |         |
|                             | UT m    | PB m    | DEX m   | 3MC m   | NF/Iso m | IAO m   | INH m   | UT f    | PB f    | DEX f   | CLO f   | TAO f   |
| CYP2E1                      | 42.57   | 56.55   | 39.49   | 47.25   | 48.53    | 34.85   | 10.79   | 51.45   | 44.63   | 41.72   | 49.88   | 51.52   |
| CYP4A1                      | 2.66    | 9.03    | 10.31   | 0.47    | 22.05    | 1.64    | 2.39    | 7.37    | 5.61    | 15.45   | 8.80    | 4.66    |
| CYP3A                       | 5.96    | 9.32    | 7.13    | 16.44   | 16.74    | 5.65    | 15.76   | 28.46   | 0.73    | 12.57   | 4.69    | 3.53    |
| CYP2C6                      | 1.44    | 1.04    | 8.42    | 1.78    | 5.19     | 13.66   | 37.34   | 12.05   | 9.10    | 6.57    | 13.56   | 0.77    |
| CYP1A1                      | 10.20   | 34.26   | 16.51   | 6.11    | 25.69    |         |         |         |         |         | 22.44   | 3.49    |
| CYP1A2                      | 6.07    | 5.22    | 4.41    | 21.06   | 47.96    |         |         | 8.03    |         |         | 23.45   | 5.78    |
| Cyrb5                       | 3.62    | 17.95   | 2.75    | 9.41    | 21.64    | 1.85    | 19.85   | 15.65   | 6.29    | 0.12    | 7.67    | 6.87    |
| CYP2B1                      | 1.69    | 8.18    | 7.08    | 5.53    | 14.50    | 11.84   | 34.81   | 6.10    | 8.93    | 9.66    | 1.00    | 0.17    |

## REFERENCES

- [1] F.P. Guengerich, *Journal of Biological Chemistry* **1977**, *252*, 3970-3979.
- [2] P. H. Roos, A. Mahnke, *Biochemical Pharmacology* **1996**, *52*, 73-84.
- [3] S. Bandiera, D. E. Ryan, W. Levin, P. E. Thomas, *Archives of Biochemistry and Biophysics* **1986**, *248*, 658-676.
- [4] M. P. Arlotto, A. J. Sonderfan, C. D. Klaassen, A. Parkinson, *Biochem Pharmacol.* **1987**, *36*, 3859-3866.
- [5] L. Waentig, N. Jakubowski, S. Hardt, C. Scheler, P. H. Roos, M. W. Linscheid, *J. Anal. At. Spectrom.* **2012**, *27*, 1311-1319.
